# Supplementary material for: Sorption and Spatial Distribution of 137Cs, 90Sr and 241Am on Mineral Phases of Fractured Rocks of Nizhnekansky Granitoid Massif
Source: MDPI journal article supplement (doi:10.3390/en15197440), 2022-10-10

## Supplementary materials

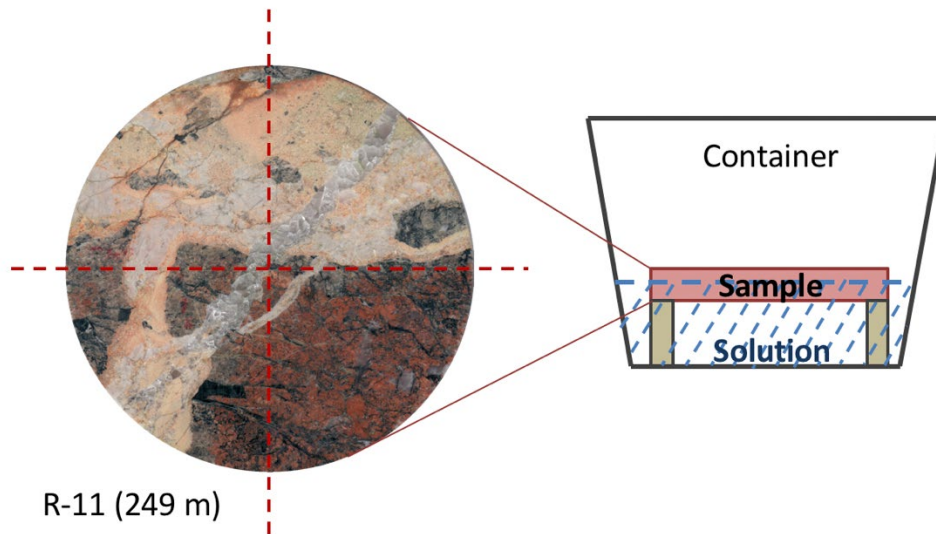

**Figure S1.** Scheme of sorption experiments on polished discs of fractured rock sample R-11.

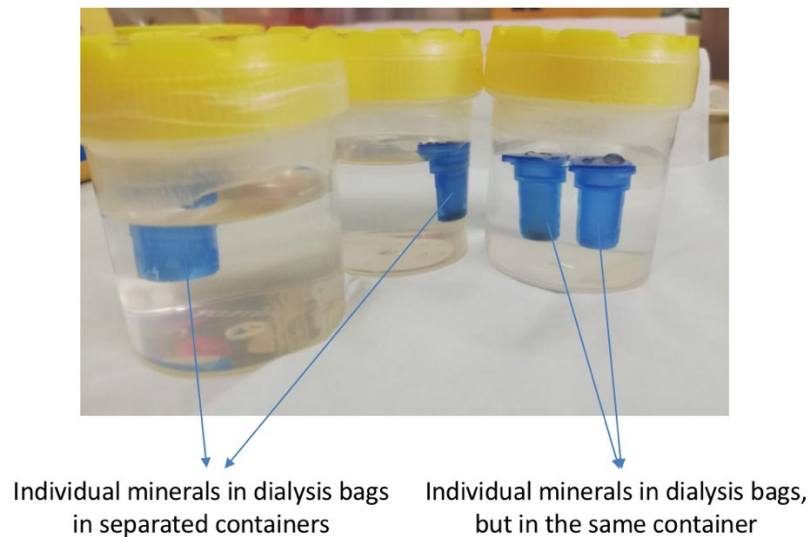

**Figure S2.** Sorption cesium on crushed quartz and biotite in separated containers and in the same container.

**Table S1.** Composition of core sample from borehole R-11 (249 m) of «Yeniseisky» site.

| Element content, wt. % |     |      |      |   |      |      |      |      | Minerals                                                                                                                                                 |
|------------------------|-----|------|------|---|------|------|------|------|----------------------------------------------------------------------------------------------------------------------------------------------------------|
| Na                     | Mg  | Al   | Si   | K | Ca   | Ti   | Fe   | O    |                                                                                                                                                          |
| -                      | 8.2 | 11.5 | 11.9 | - | -    | -    | 21.6 | 45.5 | (Fe <sup>2+</sup> , Mg, Al,<br>Fe <sup>3+</sup> ) <sub>6</sub> (Si,Al) <sub>4</sub> O <sub>10</sub> (OH,O) <sub>8</sub><br>Chlorite ( <i>chamosite</i> ) |
| -                      | -   | 12.3 | 17.4 | - | 16.3 | -    | 10.3 | 43.5 | {Ca <sub>2</sub> }{Al <sub>2</sub> Fe <sup>3+</sup> }(Si <sub>2</sub> O <sub>7</sub> )(SiO <sub>4</sub> )O(OH)<br>Epidote                                |
| -                      | -   | 0.8  | 14.5 | - | 20.5 | 23.2 | 0.7  | 41.2 | TiO <sub>2</sub> , CaCO <sub>3</sub>                                                                                                                     |

|     |   |      |      |     |      |   |   |      |                                                                                                                          |
|-----|---|------|------|-----|------|---|---|------|--------------------------------------------------------------------------------------------------------------------------|
|     |   |      |      |     |      |   |   |      | Rutile with Calcite                                                                                                      |
| 3.0 | - | 10.6 | 27.5 | 3.8 | 13.1 | - | - | 42.9 | K(Na-Ca)[AlSi <sub>3</sub> O <sub>8</sub> ]                                                                              |
|     |   |      |      |     |      |   |   |      | Feldspars                                                                                                                |
| 1.4 | - | 11.0 | 23,6 | 0.6 | 6.7  | - | - | 50.0 | (Ca,K <sub>2</sub> ,Na <sub>2</sub> )[Al <sub>2</sub> Si <sub>4</sub> O <sub>12</sub> ] <sub>2</sub> ·12H <sub>2</sub> O |
|     |   |      |      |     |      |   |   |      | Zeolite ( <i>chabazite-Ca</i> )                                                                                          |
| -   | - | -    | 46.0 | -   | -    | - | - | 54   | SiO <sub>2</sub>                                                                                                         |
|     |   |      |      |     |      |   |   |      | Quartz                                                                                                                   |

**Table S2.** Determination of mineral phases of a core sample R-11 by the micro XRF method.

| Mineral phases                                                                                                                                                                                                         | Elemental maps                                                                       |                                                                                      |
|------------------------------------------------------------------------------------------------------------------------------------------------------------------------------------------------------------------------|--------------------------------------------------------------------------------------|--------------------------------------------------------------------------------------|
| Chlorite (Fe <sup>2+</sup> , Mg, Al, Fe <sup>3+</sup> ) <sub>6</sub> (Si,Al) <sub>4</sub> O <sub>10</sub> (OH,O) <sub>8</sub><br>determining elements: Mg, Fe                                                          | 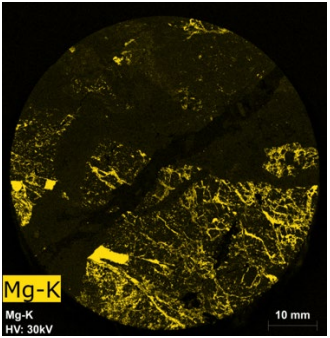   |   |
| Feldspars K(Na)[AlSi <sub>3</sub> O <sub>8</sub> ],<br>Zeolite (Ca,K <sub>2</sub> ,Na <sub>2</sub> )[Al <sub>2</sub> Si <sub>4</sub> O <sub>12</sub> ] <sub>2</sub> ·12H <sub>2</sub> O<br>determining elements: K, Na |   |  |
| Rutile TiO <sub>2</sub><br>determining element: Ti                                                                                                                                                                     |  |                                                                                      |
| Calcite CaCO <sub>3</sub><br>Zeolite-Ca (Ca,K <sub>2</sub> ,Na <sub>2</sub> )[Al <sub>2</sub> Si <sub>4</sub> O <sub>12</sub> ] <sub>2</sub> ·12H <sub>2</sub> O<br>determining element: Ca                            |  |                                                                                      |

Zeolite-Ca  $(\text{Ca}, \text{K}_2, \text{Na}_2)[\text{Al}_2\text{Si}_4\text{O}_{12}]_2 \cdot 12\text{H}_2\text{O}$   
Chlorite  $(\text{Fe}^{2+}, \text{Mg}, \text{Al}, \text{Fe}^{3+})_6(\text{Si}, \text{Al})_4\text{O}_{10}(\text{OH}, \text{O})_8$   
Feldspars  $\text{K}(\text{Na})[\text{AlSi}_3\text{O}_8]$ ,  
Quartz  $\text{SiO}_2$   
determining element: Al, Si

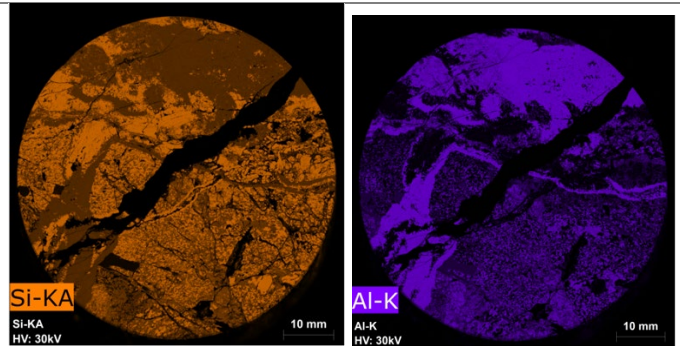

Supplement: s1 [file s1]
